# Supplementary material for: The Inhibitory Effect of Noscapine on the In Vitro Cathepsin G-Induced Collagen Expression in Equine Endometrium
Source: MDPI journal article supplement (doi:10.3390/life11101107), 2021-10-19
Supplement: s1 [file s1]

# The Inhibitory Effect of Noscaphine on the in Vitro Cathepsin G-Induced Collagen Expression in Equine Endometrium

Ana Amaral<sup>1</sup>, Carina Fernandes<sup>1</sup>, Anna Szóstek-Mioduchowska<sup>2</sup>, Karolina Lukasik<sup>2</sup>, Maria Rosa Rebordão<sup>1,3</sup>, Pedro Pinto-Bravo<sup>3</sup>, Dariusz Jan Skarzynski<sup>2</sup> and Graça Ferreira-Dias<sup>1,\*</sup>

**Table S1.** List of differences found between noscaphine (NOSC; 45 µg/mL) treatment, and cathepsin G (CAT; 0.1 and 1 µg/mL) for *COL1A2* transcription in equine endometrial explants, regardless of estrous cycle phase and treatment time.

| Evaluated variable          | Treatment comparison   | P value   | Figure |
|-----------------------------|------------------------|-----------|--------|
| <i>COL1A2</i> transcription | NOSC <i>vs</i> CAT 0.1 | P < 0.01  | 1      |
|                             | NOSC <i>vs</i> CAT 1   | P < 0.001 |        |

*COL1A2*—collagen type 1 α2; NOSC—noscaphine; CAT 0.1—cathepsin G 0.1 µg/mL; CAT 1—cathepsin G 1 µg/mL.

**Table S2.** List of differences found between noscaphine (NOSC; 45 µg/mL) treatment, and the other performed treatments: (i) cathepsin G (CAT; 0.1 and 1 µg/mL) or (ii) CAT (0.1 and 1 µg/mL) + NOSC (45 µg/mL) for *COL1A2* transcription and COL1 protein relative abundance in equine endometrial explants from follicular (FP) or mid-luteal (MLP) phases, treated for 24h or 48h.

| Evaluated variable              | Treatment comparison                 | P value   | Figure |
|---------------------------------|--------------------------------------|-----------|--------|
| <i>COL1A2</i> transcription     | NOSC <i>vs</i> CAT 0.1 FP 24 h       | P < 0.01  | 2A     |
|                                 | NOSC <i>vs</i> CAT 1 FP 24 h         | P < 0.001 |        |
|                                 | NOSC <i>vs</i> CAT 1 + NOSC FP 24 h  | P < 0.01  | 2B     |
|                                 | NOSC <i>vs</i> CAT 1 MLP 24 h        | P < 0.01  |        |
|                                 | NOSC <i>vs</i> CAT 1 MLP 48 h        | P < 0.01  |        |
| COL1 protein relative abundance | NOSC <i>vs</i> CAT 1 MLP 48 h        | P < 0.001 | 2C     |
|                                 | NOSC <i>vs</i> CAT 1 + NOSC MLP 48 h | P < 0.001 |        |

*COL1A2*—collagen type 1 α2; COL1—collagen type 1; NOSC—noscaphine; CAT 0.1—cathepsin G 0.1 µg/mL; CAT 1—cathepsin G 1 µg/mL; FP—follicular phase; MLP—mid-luteal phase.

**Table S3.** List of differences found in the same treatments between 24h or 48h of treatment, within each estrous cycle phase.

| Evaluated variables             | Treatment comparison                                    | P value  | Figures |
|---------------------------------|---------------------------------------------------------|----------|---------|
| <i>COL1A2</i> transcription     | CAT 1 24 h FP <i>vs</i> CAT 1 48 h FP                   | P < 0.05 | 2A      |
|                                 | CAT 0.1 + NOSC 24 h FP <i>vs</i> CAT 0.1 + NOSC 48 h FP | P < 0.01 |         |
| COL1 protein relative abundance | CAT 0.1 24 h FP <i>vs</i> CAT 0.1 48 h FP               | P < 0.01 | 2C      |
|                                 | CAT 1 24 h FP <i>vs</i> CAT 1 48 h FP                   | P < 0.05 |         |
|                                 | CAT 1 + NOSC 24 h MLP <i>vs</i> CAT 1 + NOSC 48 h MLP   | P < 0.05 | 2D      |

*COL1A2*—collagen type 1 α2; COL 1—collagen type I; CAT 0.1—cathepsin G 0.1 µg/mL; CAT 1—cathepsin G 1 µg/mL; NOSC—noscaphine; FP—follicular phase; MLP—mid-luteal phase.

**Table S4.** List of differences found in the same treatments between the follicular phase (FP) and mid-luteal phase (MLP) of the estrous cycle, within each treatment time.

| Evaluated variables             | Treatment comparison                                 | P value   | Figures |
|---------------------------------|------------------------------------------------------|-----------|---------|
| COL1A2 transcription            | CAT 1 48 h FP <i>vs</i> CAT 1 48 h MLP               | P < 0.01  | 2A, 2B  |
|                                 | CAT 1 + NOSC 24 h FP <i>vs</i> CAT 1 + NOSC 24 h MLP | P < 0.01  |         |
| COL1 protein relative abundance | CAT 0.1 48 h FP <i>vs</i> CAT 0.1 48 h MLP           | P < 0.05  | 2C, 2D  |
|                                 | CAT 1 + NOSC 48 h FP <i>vs</i> CAT 1 + NOSC 48 h MLP | P < 0.001 |         |

COL1A2—collagen type 1  $\alpha 2$ ; COL 1—collagen type I; CAT 0.1—cathepsin G 0.1  $\mu\text{g/mL}$ ; CAT 1—cathepsin G 1  $\mu\text{g/mL}$ ; NOSC—noscapine; FP—follicular phase; MLP—mid-luteal phase.

**Table S5.** Means and SEM for the performed treatments: (i) cathepsin G (CAT; 0.1 and 1  $\mu\text{g/mL}$ ); noscapine (NOSC; 45  $\mu\text{g/mL}$ ) or (ii) CAT (0.1 and 1  $\mu\text{g/mL}$ ) + NOSC (45  $\mu\text{g/mL}$ ) for COL1A2 transcription and COL1 protein relative abundance in equine endometrial explants from follicular (FP) or mid-luteal (MLP) phases treated for 24 h or 48 h.

|                                        |                | COL1A2 |      | COL1  |      |
|----------------------------------------|----------------|--------|------|-------|------|
| Time of treatment/ estrous cycle phase | Treatment      | Mean   | SEM  | Mean  | SEM  |
| 24 h FP                                | CONTROL        | 93.7   | 20.5 | 99.5  | 9.1  |
|                                        | NOSC           | 68.0   | 20.9 | 111.2 | 11.1 |
|                                        | CAT 0.1        | 182.6  | 34.2 | 113.6 | 10.4 |
|                                        | CAT 0.1 + NOSC | 36.3   | 16.5 | 110.7 | 12.1 |
|                                        | CAT 1          | 212.5  | 36.9 | 98.6  | 9.7  |
|                                        | CAT 1 + NOSC   | 213.3  | 43.8 | 100.2 | 11.5 |
| 48 h FP                                | CONTROL        | 92.0   | 20.3 | 99.5  | 9.1  |
|                                        | NOSC           | 79.1   | 26.7 | 131.0 | 14.7 |
|                                        | CAT 0.1        | 141.3  | 32.5 | 136.4 | 11.4 |
|                                        | CAT 0.1 + NOSC | 53.9   | 22.0 | 100.9 | 11.6 |
|                                        | CAT 1          | 104.0  | 24.2 | 130.2 | 11.1 |
|                                        | CAT 1 + NOSC   | 58.4   | 22.9 | 105.3 | 13.2 |
| 24 h MLP                               | CONTROL        | 113.0  | 35.6 | 111.5 | 13.6 |
|                                        | NOSC           | 53.4   | 28.3 | 133.5 | 14.9 |
|                                        | CAT 0.1        | 103.9  | 34.2 | 154.8 | 18.5 |
|                                        | CAT 0.1 + NOSC | 50.5   | 23.8 | 141.9 | 15.3 |
|                                        | CAT 1          | 250.3  | 53.0 | 129.6 | 14.7 |
|                                        | CAT 1 + NOSC   | 67.1   | 27.5 | 131.4 | 14.8 |
| 48 h MLP                               | CONTROL        | 77.7   | 20.9 | 89.1  | 8.6  |
|                                        | NOSC           | 102.2  | 27.7 | 101.7 | 11.6 |
|                                        | CAT 0.1        | 167.8  | 35.5 | 102.2 | 9.2  |
|                                        | CAT 0.1 + NOSC | 52.4   | 24.3 | 114.0 | 15.9 |
|                                        | CAT 1          | 297.6  | 57.8 | 165.1 | 14.8 |
|                                        | CAT 1 + NOSC   | 66.1   | 27.3 | 190.2 | 17.8 |

COL1A2—collagen type 1  $\alpha 2$ ; COL1—collagen type 1; CAT 0.1—cathepsin G 0.1  $\mu\text{g/mL}$ ; CAT 1—cathepsin G 1  $\mu\text{g/mL}$ ; NOSC—noscapine 45  $\mu\text{g/mL}$ ; FP—follicular phase; MLP—mid-luteal phase.

**Table S6.** Levels of significance (P values) between cathepsin G (CAT) or noscapine (NOSC) treatments of equine endometrial explants from follicular phase (FP) or mid-luteal phase (MLP) treated for 24 h or 48 h in the analyses of relative transcript COL1A2 gene. The results were considered significant at  $P < 0.05$ .

|                         | Control 24h FP | Control 24h MLP | Control 48h FP | Control 48h MLP | NOSC 24h FP | NOSC 24h MLP | NOSC 48h FP | NOSC 48h MLP | CAT 0.1 24h FP | CAT 0.1 24h MLP | CAT 0.1 48h FP | CAT 0.1 48h MLP | CAT 0.1 +<br>NOSC 24h FP | CAT 0.1 +<br>NOSC 24h MLP | CAT 0.1 +<br>NOSC 48h FP | CAT 0.1 +<br>NOSC 48h MLP | CAT 1 24h FP | CAT 1 24h MLP | CAT 1 48h FP | CAT 1 48h MLP | CAT 1 +<br>NOSC 24h FP | CAT 1 +<br>NOSC 24h MLP | CAT 1 +<br>NOSC 48h FP | CAT 1 +<br>NOSC 48h MLP |
|-------------------------|----------------|-----------------|----------------|-----------------|-------------|--------------|-------------|--------------|----------------|-----------------|----------------|-----------------|--------------------------|---------------------------|--------------------------|---------------------------|--------------|---------------|--------------|---------------|------------------------|-------------------------|------------------------|-------------------------|
| Control 24h FP          |                | 0.6297          | 0.9515         | 0.5842          | 0.3823      | 0.2789       | 0.6667      | 0.8037       | 0.0208         | 0.7948          | 0.2005         | 0.0585          | 0.0348                   | 0.1923                    | 0.201                    | 0.2164                    | 0.0034       | 0.0022        | 0.7427       | 0.0002        | 0.0077                 | 0.4492                  | 0.2634                 | 0.4315                  |
| Control 24 h MLP        | 0.6297         |                 | 0.5975         | 0.3742          | 0.2542      | 0.1921       | 0.4376      | 0.8078       | 0.1681         | 0.8524          | 0.5584         | 0.2798          | 0.0335                   | 0.1359                    | 0.1426                   | 0.1514                    | 0.0601       | 0.0288        | 0.8323       | 0.0056        | 0.0765                 | 0.3006                  | 0.1816                 | 0.2892                  |
| Control 48 h FP         | 0.9515         | 0.5975          |                | 0.6241          | 0.4129      | 0.2975       | 0.7031      | 0.7633       | 0.018          | 0.7596          | 0.1828         | 0.052           | 0.0394                   | 0.2083                    | 0.2188                   | 0.2339                    | 0.0028       | 0.0019        | 0.6999       | 0.0002        | 0.0067                 | 0.4771                  | 0.285                  | 0.4588                  |
| Control 48 h MLP        | 0.5842         | 0.3742          | 0.6241         |                 | 0.7404      | 0.5021       | 0.9667      | 0.4728       | 0.0072         | 0.4998          | 0.0894         | 0.0227          | 0.1213                   | 0.4016                    | 0.4375                   | 0.4395                    | 0.0011       | 0.0008        | 0.4067       | <0.001        | 0.0027                 | 0.7582                  | 0.5344                 | 0.7364                  |
| NOSC 24 h FP            | 0.3823         | 0.2542          | 0.4129         | 0.7404          |             | 0.6815       | 0.7388      | 0.3155       | 0.0036         | 0.3515          | 0.0511         | 0.0121          | 0.2302                   | 0.5845                    | 0.6428                   | 0.6296                    | 0.0005       | 0.0004        | 0.2581       | <0.001        | 0.0014                 | 0.9783                  | 0.7547                 | 0.9558                  |
| NOSC 24 h MLP           | 0.2789         | 0.1921          | 0.2975         | 0.5021          | 0.6815      |              | 0.5126      | 0.2347       | 0.0077         | 0.2569          | 0.0533         | 0.0176          | 0.5851                   | 0.9378                    | 0.9873                   | 0.98                      | 0.0019       | 0.0011        | 0.2002       | 0.0001        | 0.0032                 | 0.7274                  | 0.8908                 | 0.7449                  |
| NOSC 48 h FP            | 0.6667         | 0.4376          | 0.7031         | 0.9667          | 0.7388      | 0.5126       |             | 0.5477       | 0.0191         | 0.5614          | 0.1394         | 0.0457          | 0.155                    | 0.423                     | 0.4609                   | 0.4586                    | 0.0042       | 0.0023        | 0.4925       | 0.0003        | 0.0075                 | 0.7517                  | 0.5501                 | 0.7318                  |
| NOSC 48 h MLP           | 0.8037         | 0.8078          | 0.7633         | 0.4728          | 0.3155      | 0.2347       | 0.5477      |              | 0.0676         | 0.9685          | 0.3549         | 0.1399          | 0.035                    | 0.1639                    | 0.1716                   | 0.1834                    | 0.017        | 0.0087        | 0.9596       | 0.0011        | 0.027                  | 0.3725                  | 0.2216                 | 0.3581                  |
| CAT 0.1 24 h FP         | 0.0208         | 0.1681          | 0.018          | 0.0072          | 0.0036      | 0.0077       | 0.0191      | 0.0676       |                | 0.1129          | 0.3798         | 0.7626          | <0.001                   | 0.0026                    | 0.0019                   | 0.0032                    | 0.5493       | 0.2688        | 0.056        | 0.0747        | 0.5742                 | 0.0118                  | 0.0031                 | 0.0109                  |
| CAT 0.1 24 h MLP        | 0.7948         | 0.8524          | 0.7596         | 0.4998          | 0.3515      | 0.2569       | 0.5614      | 0.9685       | 0.1129         |                 | 0.4305         | 0.1996          | 0.0539                   | 0.191                     | 0.2031                   | 0.211                     | 0.0371       | 0.018         | 0.9976       | 0.0032        | 0.0496                 | 0.3952                  | 0.2536                 | 0.3815                  |
| CAT 0.1 48 h FP         | 0.2005         | 0.5584          | 0.1828         | 0.0894          | 0.0511      | 0.0533       | 0.1394      | 0.3549       | 0.3798         | 0.4305          |                | 0.578           | 0.0027                   | 0.0276                    | 0.0256                   | 0.0322                    | 0.1474       | 0.0685        | 0.3481       | 0.0136        | 0.1781                 | 0.0871                  | 0.0367                 | 0.0822                  |
| CAT 0.1 48 h MLP        | 0.0585         | 0.2798          | 0.052          | 0.0227          | 0.0121      | 0.0176       | 0.0457      | 0.1399       | 0.7626         | 0.1996          | 0.578          |                 | 0.0004                   | 0.0073                    | 0.0061                   | 0.0088                    | 0.3808       | 0.1829        | 0.1267       | 0.0471        | 0.4122                 | 0.0281                  | 0.0093                 | 0.0262                  |
| CAT 0.1 + NOSC 24 h FP  | 0.0348         | 0.0335          | 0.0394         | 0.1213          | 0.2302      | 0.5851       | 0.155       | 0.035        | <0.001         | 0.0539          | 0.0027         | 0.0004          |                          | 0.613                     | 0.5114                   | 0.5697                    | <0.001       | <0.001        | 0.0215       | <0.001        | <0.001                 | 0.3131                  | 0.4223                 | 0.3263                  |
| CAT 0.1 + NOSC 24 h MLP | 0.1923         | 0.1359          | 0.2083         | 0.4016          | 0.5845      | 0.9378       | 0.423       | 0.1639       | 0.0026         | 0.191           | 0.0276         | 0.0073          | 0.613                    |                           | 0.9154                   | 0.9543                    | 0.0005       | 0.0003        | 0.1308       | <0.001        | 0.001                  | 0.645                   | 0.8116                 | 0.663                   |
| CAT 0.1 + NOSC 48 h FP  | 0.201          | 0.1426          | 0.2188         | 0.4375          | 0.6428      | 0.9873       | 0.4609      | 0.1716       | 0.0019         | 0.2031          | 0.0256         | 0.0061          | 0.5114                   | 0.9154                    |                          | 0.9634                    | 0.0003       | 0.0002        | 0.134        | <0.001        | 0.0008                 | 0.7043                  | 0.8885                 | 0.724                   |
| CAT 0.1 + NOSC 48 h MLP | 0.2164         | 0.1514          | 0.2339         | 0.4395          | 0.6296      | 0.98         | 0.4586      | 0.1834       | 0.0032         | 0.211           | 0.0322         | 0.0088          | 0.5697                   | 0.9543                    | 0.9634                   |                           | 0.0006       | 0.0004        | 0.1483       | <0.001        | 0.0013                 | 0.6866                  | 0.8587                 | 0.705                   |
| CAT 1 24 h FP           | 0.0034         | 0.0601          | 0.0028         | 0.0011          | 0.0005      | 0.0019       | 0.0042      | 0.017        | 0.5493         | 0.0371          | 0.1474         | 0.3808          | <0.001                   | 0.0005                    | 0.0003                   | 0.0006                    |              | 0.5502        | 0.0121       | 0.2008        | 0.9879                 | 0.0027                  | 0.0005                 | 0.0024                  |
| CAT 1 24 h MLP          | 0.0022         | 0.0288          | 0.0019         | 0.0008          | 0.0004      | 0.0011       | 0.0023      | 0.0087       | 0.2688         | 0.018           | 0.0685         | 0.1829          | <0.001                   | 0.0003                    | 0.0002                   | 0.0004                    | 0.5502       |               | 0.0066       | 0.5434        | 0.5857                 | 0.0015                  | 0.0004                 | 0.0014                  |
| CAT 1 48 h FP           | 0.7427         | 0.8323          | 0.6999         | 0.4067          | 0.2581      | 0.2002       | 0.4925      | 0.9596       | 0.056          | 0.9976          | 0.3481         | 0.1267          | 0.0215                   | 0.1308                    | 0.134                    | 0.1483                    | 0.0121       | 0.0066        |              | 0.0007        | 0.0215                 | 0.325                   | 0.1785                 | 0.3111                  |

|                       |        |        |        |         |         |        |        |        |        |        |        |        |         |         |         |         |        |        |        |         |        |        |         |        |
|-----------------------|--------|--------|--------|---------|---------|--------|--------|--------|--------|--------|--------|--------|---------|---------|---------|---------|--------|--------|--------|---------|--------|--------|---------|--------|
| CAT 1 48 h MLP        | 0.0002 | 0.0056 | 0.0002 | <0.0001 | <0.0001 | 0.0001 | 0.0003 | 0.0011 | 0.0747 | 0.0032 | 0.0136 | 0.0471 | <0.0001 | <0.0001 | <0.0001 | <0.0001 | 0.2008 | 0.5434 | 0.0007 |         | 0.2369 | 0.0002 | <0.0001 | 0.0002 |
| CAT 1 + NOSC 24 h FP  | 0.0077 | 0.0765 | 0.0067 | 0.0027  | 0.0014  | 0.0032 | 0.0075 | 0.027  | 0.5742 | 0.0496 | 0.1781 | 0.4122 | <0.0001 | 0.001   | 0.0008  | 0.0013  | 0.9879 | 0.5857 | 0.0215 | 0.2369  |        | 0.0047 | 0.0012  | 0.0044 |
| CAT 1 + NOSC 24 h MLP | 0.4492 | 0.3006 | 0.4771 | 0.7582  | 0.9783  | 0.7274 | 0.7517 | 0.3725 | 0.0118 | 0.3952 | 0.0871 | 0.0281 | 0.3131  | 0.645   | 0.7043  | 0.6866  | 0.0027 | 0.0015 | 0.325  | 0.0002  | 0.0047 |        | 0.8046  | 0.98   |
| CAT 1 + NOSC 48 h FP  | 0.2634 | 0.1816 | 0.285  | 0.5344  | 0.7547  | 0.8908 | 0.5501 | 0.2216 | 0.0031 | 0.2536 | 0.0367 | 0.0093 | 0.4223  | 0.8116  | 0.8885  | 0.8587  | 0.0005 | 0.0004 | 0.1785 | <0.0001 | 0.0012 | 0.8046 |         | 0.825  |
| CAT 1 + NOSC 48 h MLP | 0.4315 | 0.2892 | 0.4588 | 0.7364  | 0.9558  | 0.7449 | 0.7318 | 0.3581 | 0.0109 | 0.3815 | 0.0822 | 0.0262 | 0.3263  | 0.663   | 0.724   | 0.705   | 0.0024 | 0.0014 | 0.3111 | 0.0002  | 0.0044 | 0.98   | 0.825   |        |

COL1A2—collagen type 1  $\alpha$ 2; CAT 0.1—cathepsin G 0.1  $\mu$ g/mL; CAT 1—cathepsin G 1  $\mu$ g/mL; NOSC—noscapine 45  $\mu$ g/mL; FP—follicular phase; MLP—mid-luteal phase.

**Table S7.** Levels of significance (P values) between cathepsin G (CAT) or noscapine (NOSC) treatments of equine endometrial explants from follicular phase (FP) or mid-luteal phase (MLP) treated for 24 h or 48 h in the analyses of COL1 protein relative abundance. The results were considered significant at  $P < 0.05$ .

|                         | Control 24h FP | Control 24h MLP | Control 48h FP | Control 48h MLP | NOSC 24h FP | NOSC 24h MLP | NOSC 48h FP | NOSC 48h MLP | CAT 0.1 24h FP | CAT 0.1 24h MLP | CAT 0.1 48h FP | CAT 0.1 48h MLP | CAT 0.1 +<br>NOSC 24h FP | CAT 0.1 +<br>NOSC 24h MLP | CAT 0.1 +<br>NOSC 48h FP | CAT 0.1 +<br>NOSC 48h MLP | CAT 1 24h FP | CAT 1 24h MLP | CAT 1 48h FP | CAT 1 48h MLP | CAT 1 +<br>NOSC 24h FP | CAT 1 +<br>NOSC 24h MLP | CAT 1 +<br>NOSC 48h FP | CAT 1 +<br>NOSC 48h MLP |
|-------------------------|----------------|-----------------|----------------|-----------------|-------------|--------------|-------------|--------------|----------------|-----------------|----------------|-----------------|--------------------------|---------------------------|--------------------------|---------------------------|--------------|---------------|--------------|---------------|------------------------|-------------------------|------------------------|-------------------------|
| Control 24 h FP         |                | 0.458           | 0.9999         | 0.4017          | 0.4121      | 0.0459       | 0.0627      | 0.8811       | 0.3026         | 0.0051          | 0.0111         | 0.8385          | 0.4561                   | 0.0147                    | 0.9264                   | 0.4179                    | 0.944        | 0.0737        | 0.032        | 0.0001        | 0.9648                 | 0.0592                  | 0.7179                 | <.0001                  |
| Control 24 h MLP        | 0.458          |                 | 0.4579         | 0.155           | 0.9858      | 0.2718       | 0.3275      | 0.5817       | 0.8987         | 0.0552          | 0.1623         | 0.5644          | 0.9647                   | 0.1358                    | 0.5489                   | 0.9019                    | 0.4336       | 0.36          | 0.2888       | 0.0085        | 0.522                  | 0.3165                  | 0.741                  | 0.0005                  |
| Control 48 h FP         | 0.9999         | 0.4579          |                | 0.4018          | 0.4121      | 0.0459       | 0.0627      | 0.8811       | 0.3026         | 0.0051          | 0.0111         | 0.8385          | 0.4561                   | 0.0147                    | 0.9264                   | 0.4179                    | 0.944        | 0.0737        | 0.032        | 0.0001        | 0.9648                 | 0.0592                  | 0.7179                 | <.0001                  |
| Control 48 h MLP        | 0.4017         | 0.155           | 0.4018         |                 | 0.112       | 0.0079       | 0.0116      | 0.3764       | 0.0672         | 0.0007          | 0.001          | 0.2979          | 0.1402                   | 0.002                     | 0.4079                   | 0.1542                    | 0.4592       | 0.0142        | 0.0035       | <.0001        | 0.4356                 | 0.0108                  | 0.2963                 | <.0001                  |
| NOSC 24 h FP            | 0.4121         | 0.9858          | 0.4121         | 0.112           |             | 0.2222       | 0.2758      | 0.5543       | 0.8698         | 0.0372          | 0.1112         | 0.5273          | 0.976                    | 0.099                     | 0.5189                   | 0.8813                    | 0.3891       | 0.3077        | 0.2245       | 0.0035        | 0.49                   | 0.2651                  | 0.7306                 | 0.0001                  |
| NOSC 24 h MLP           | 0.0459         | 0.2718          | 0.0459         | 0.0079          | 0.2222      |              | 0.904       | 0.0889       | 0.2658         | 0.3617          | 0.8724         | 0.0666          | 0.2294                   | 0.6912                    | 0.0803                   | 0.3706                    | 0.0446       | 0.8533        | 0.8575       | 0.1317        | 0.0736                 | 0.9219                  | 0.1539                 | 0.0145                  |
| NOSC 48 h FP            | 0.0627         | 0.3275          | 0.0627         | 0.0116          | 0.2758      | 0.904        |             | 0.1149       | 0.3282         | 0.3063          | 0.7667         | 0.0895          | 0.282                    | 0.6047                    | 0.1043                   | 0.4329                    | 0.0607       | 0.9488        | 0.9653       | 0.1026        | 0.096                  | 0.982                   | 0.1913                 | 0.0105                  |
| NOSC 48 h MLP           | 0.8811         | 0.5817          | 0.8811         | 0.3764          | 0.5543      | 0.0889       | 0.1149      |              | 0.4432         | 0.0127          | 0.0347         | 0.9767          | 0.5909                   | 0.0349                    | 0.9589                   | 0.5256                    | 0.8355       | 0.1311        | 0.0789       | 0.0009        | 0.9243                 | 0.1096                  | 0.8393                 | <.0001                  |
| CAT 0.1 24 h FP         | 0.3026         | 0.8987          | 0.3026         | 0.0672          | 0.8698      | 0.2658       | 0.3282      | 0.4432       |                | 0.0449          | 0.1364         | 0.4036          | 0.8518                   | 0.1199                    | 0.411                    | 0.9834                    | 0.2865       | 0.3651        | 0.2735       | 0.0041        | 0.3849                 | 0.3158                  | 0.6171                 | 0.0002                  |
| CAT 0.1 24 h MLP        | 0.0051         | 0.0552          | 0.0051         | 0.0007          | 0.0372      | 0.3617       | 0.3063      | 0.0127       | 0.0449         |                 | 0.3876         | 0.0079          | 0.0411                   | 0.5853                    | 0.0113                   | 0.0925                    | 0.0051       | 0.2792        | 0.2417       | 0.6627        | 0.0102                 | 0.3162                  | 0.0268                 | 0.1688                  |
| CAT 0.1 48 h FP         | 0.0111         | 0.1623          | 0.0111         | 0.001           | 0.1112      | 0.8724       | 0.7667      | 0.0347       | 0.1364         | 0.3876          |                | 0.0187          | 0.1224                   | 0.7737                    | 0.0303                   | 0.2563                    | 0.0115       | 0.7121        | 0.69         | 0.1199        | 0.027                  | 0.7862                  | 0.0778                 | 0.0095                  |
| CAT 0.1 48 h MLP        | 0.8385         | 0.5644          | 0.8385         | 0.2979          | 0.5273      | 0.0666       | 0.0895      | 0.9767       | 0.4036         | 0.0079          | 0.0187         |                 | 0.5707                   | 0.0226                    | 0.9311                   | 0.5092                    | 0.7894       | 0.104         | 0.0508       | 0.0003        | 0.8929                 | 0.0847                  | 0.8454                 | <.0001                  |
| CAT 0.1 + NOSC 24 h FP  | 0.4561         | 0.9647          | 0.4561         | 0.1402          | 0.976       | 0.2294       | 0.282       | 0.5909       | 0.8518         | 0.0411          | 0.1224         | 0.5707          |                          | 0.1064                    | 0.5559                   | 0.8654                    | 0.431        | 0.3132        | 0.2359       | 0.0046        | 0.5272                 | 0.2716                  | 0.7609                 | 0.0002                  |
| CAT 0.1 + NOSC 24 h MLP | 0.0147         | 0.1358          | 0.0147         | 0.002           | 0.099       | 0.6912       | 0.6047      | 0.0349       | 0.1199         | 0.5853          | 0.7737         | 0.0226          | 0.1064                   |                           | 0.0311                   | 0.2076                    | 0.0147       | 0.5607        | 0.5305       | 0.2741        | 0.0281                 | 0.6205                  | 0.0694                 | 0.0392                  |
| CAT 0.1 + NOSC 48 h FP  | 0.9264         | 0.5489          | 0.9264         | 0.4079          | 0.5189      | 0.0803       | 0.1043      | 0.9589       | 0.411          | 0.0113          | 0.0303         | 0.9311          | 0.5559                   | 0.0311                    |                          | 0.497                     | 0.8792       | 0.1193        | 0.07         | 0.0007        | 0.9653                 | 0.0994                  | 0.8015                 | <.0001                  |
| CAT 0.1 + NOSC 48 h MLP | 0.4179         | 0.9019          | 0.4179         | 0.1542          | 0.8813      | 0.3706       | 0.4329      | 0.5256       | 0.9834         | 0.0925          | 0.2563         | 0.5092          | 0.8654                   | 0.2076                    | 0.497                    |                           | 0.3969       | 0.4684        | 0.4075       | 0.0214        | 0.4735                 | 0.4208                  | 0.6678                 | 0.0018                  |
| CAT 1 24 h FP           | 0.944          | 0.4336          | 0.944          | 0.4592          | 0.3891      | 0.0446       | 0.0607      | 0.8355       | 0.2865         | 0.0051          | 0.0115         | 0.7894          | 0.431                    | 0.0147                    | 0.8792                   | 0.3969                    |              | 0.0711        | 0.0321       | 0.0002        | 0.9163                 | 0.0574                  | 0.6811                 | <.0001                  |
| CAT 1 24 h MLP          | 0.0737         | 0.36            | 0.0737         | 0.0142          | 0.3077      | 0.8533       | 0.9488      | 0.1311       | 0.3651         | 0.2792          | 0.7121         | 0.104           | 0.3132                   | 0.5607                    | 0.1193                   | 0.4684                    | 0.0711       |               | 0.9769       | 0.0894        | 0.11                   | 0.9308                  | 0.2138                 | 0.0088                  |
| CAT 1 48 h FP           | 0.032          | 0.2888          | 0.032          | 0.0035          | 0.2245      | 0.8575       | 0.9653      | 0.0789       | 0.2735         | 0.2417          | 0.69           | 0.0508          | 0.2359                   | 0.5305                    | 0.07                     | 0.4075                    | 0.0321       | 0.9769        |              | 0.0559        | 0.0632                 | 0.945                   | 0.1528                 | 0.0035                  |

|                          |        |        |        |        |        |        |        |        |        |        |        |        |        |        |        |        |        |        |        |        |        |        |        |        |
|--------------------------|--------|--------|--------|--------|--------|--------|--------|--------|--------|--------|--------|--------|--------|--------|--------|--------|--------|--------|--------|--------|--------|--------|--------|--------|
| CAT 1 48 h MLP           | 0.0001 | 0.0085 | 0.0001 | <.0001 | 0.0035 | 0.1317 | 0.1026 | 0.0009 | 0.0041 | 0.6627 | 0.1199 | 0.0003 | 0.0046 | 0.2741 | 0.0007 | 0.0214 | 0.0002 | 0.0894 | 0.0559 |        | 0.0006 | 0.1076 | 0.0031 | 0.2733 |
| CAT 1 + NOSC 24 h FP     | 0.9648 | 0.522  | 0.9648 | 0.4356 | 0.49   | 0.0736 | 0.096  | 0.9243 | 0.3849 | 0.0102 | 0.027  | 0.8929 | 0.5272 | 0.0281 | 0.9653 | 0.4735 | 0.9163 | 0.11   | 0.0632 | 0.0006 |        | 0.0915 | 0.77   | <.0001 |
| CAT 1 + NOSC 24 h<br>MLP | 0.0592 | 0.3165 | 0.0592 | 0.0108 | 0.2651 | 0.9219 | 0.982  | 0.1096 | 0.3158 | 0.3162 | 0.7862 | 0.0847 | 0.2716 | 0.6205 | 0.0994 | 0.4208 | 0.0574 | 0.9308 | 0.945  | 0.1076 | 0.0915 |        | 0.1838 | 0.0111 |
| CAT 1 + NOSC 48 h FP     | 0.7179 | 0.741  | 0.7179 | 0.2963 | 0.7306 | 0.1539 | 0.1913 | 0.8393 | 0.6171 | 0.0268 | 0.0778 | 0.8454 | 0.7609 | 0.0694 | 0.8015 | 0.6678 | 0.6811 | 0.2138 | 0.1528 | 0.0031 | 0.77   | 0.1838 |        | 0.0002 |
| CAT 1 + NOSC 48 h<br>MLP | <.0001 | 0.0005 | <.0001 | <.0001 | 0.0001 | 0.0145 | 0.0105 | <.0001 | 0.0002 | 0.1688 | 0.0095 | <.0001 | 0.0002 | 0.0392 | <.0001 | 0.0018 | <.0001 | 0.0088 | 0.0035 | 0.2733 | <.0001 | 0.0111 | 0.0002 |        |

**COL1—collagen type 1; CAT 0.1—cathepsin G 0.1 µg/mL; CAT 1—cathepsin G 1 µg/mL; NOSC—noscipine 45 µg/mL; FP—follicular phase; MLP—mid-luteal phase.**

**Table S8.** Means and SEM for the performed treatments: (i) cathepsin G (CAT; 0.1 and 1 µg/mL); noscapine (NOSC; 45 µg/mL) or (ii) CAT (0.1 and 1 µg/mL) + NOSC (45 µg/mL) for COL1A2 transcription and COL1 protein relative abundance in equine endometrial explants treated for 24h or 48h, independently of estrous cycle phase.

| Time of treatment/ estrous cycle phase | Treatment      | COL1A2 |      | COL1  |      |
|----------------------------------------|----------------|--------|------|-------|------|
|                                        |                | Mean   | SEM  | Mean  | SEM  |
| 24 h                                   | CONTROL        | 98.9   | 19.5 | 107.4 | 8.2  |
|                                        | NOSC           | 64.7   | 18.3 | 120.6 | 9.2  |
|                                        | CAT 0.1        | 144.9  | 25.2 | 131.4 | 10.1 |
|                                        | CAT 0.1 + NOSC | 41.2   | 13.9 | 126.3 | 9.8  |
|                                        | CAT 1          | 229.9  | 31.8 | 112.9 | 8.6  |
|                                        | CAT 1 + NOSC   | 130.3  | 25.7 | 115.6 | 9.3  |
| 48 h                                   | CONTROL        | 85.3   | 14.7 | 94.3  | 6.3  |
|                                        | NOSC           | 91.2   | 19.4 | 115.1 | 9.3  |
|                                        | CAT 0.1        | 154.2  | 24.1 | 118.5 | 7.3  |
|                                        | CAT 0.1 + NOSC | 54.5   | 16.6 | 106.1 | 9.7  |
|                                        | CAT 1          | 189.6  | 28.1 | 147.6 | 9.2  |
|                                        | CAT 1 + NOSC   | 61.9   | 17.7 | 144.6 | 11.0 |

COL1A2—collagen type 1 α2; COL1—collagen type 1; CAT 0.1—cathepsin G 0.1 µg/mL; CAT 1—cathepsin G 1 µg/mL; NOSC—noscapine 45 µg/mL.

**Table S9.** Levels of significance (P values) between cathepsin G (CAT) or noscapine (NOSC) treatments of equine endometrial explants treated for 24h or 48h in the analyses of relative transcript COL1A2 gene. The results were considered significant at P < 0.05.

|                    | Control 24h | Control 48h | NOSC 24h | NOSC 48h | CAT 0.1 24h | CAT 0.1 48h | CAT 0.1 + NOSC 24h | CAT 0.1 + NOSC 48h | CAT 1 24h | CAT 1 48h | CAT 1 + NOSC 24h | CAT 1 + NOSC 48h |
|--------------------|-------------|-------------|----------|----------|-------------|-------------|--------------------|--------------------|-----------|-----------|------------------|------------------|
| Control 24h        |             | 0.5709      | 0.1955   | 0.7752   | 0.1415      | 0.0727      | 0.0166             | 0.0844             | 0.0003    | 0.0077    | 0.3233           | 0.1614           |
| Control 48h        | 0.5709      |             | 0.3875   | 0.8093   | 0.0339      | 0.0118      | 0.0361             | 0.1764             | <.0001    | 0.0006    | 0.1134           | 0.318            |
| NOSC 24h           | 0.1955      | 0.3875      |          | 0.3226   | 0.0107      | 0.0038      | 0.2977             | 0.6786             | <.0001    | 0.0002    | 0.0351           | 0.9139           |
| NOSC 48h           | 0.7752      | 0.8093      | 0.3226   |          | 0.0879      | 0.0413      | 0.0353             | 0.1519             | 0.0002    | 0.0037    | 0.216            | 0.266            |
| CAT 0.1 24h        | 0.1415      | 0.0339      | 0.0107   | 0.0879   |             | 0.7875      | 0.0002             | 0.0028             | 0.0347    | 0.2359    | 0.684            | 0.0071           |
| CAT 0.1 48h        | 0.0727      | 0.0118      | 0.0038   | 0.0413   | 0.7875      |             | <.0001             | 0.0009             | 0.0547    | 0.3353    | 0.4966           | 0.0025           |
| CAT 0.1 + NOSC 24h | 0.0166      | 0.0361      | 0.2977   | 0.0353   | 0.0002      | <.0001      |                    | 0.535              | <.0001    | <.0001    | 0.0016           | 0.3512           |
| CAT 0.1 + NOSC 48h | 0.0844      | 0.1764      | 0.6786   | 0.1519   | 0.0028      | 0.0009      | 0.535              |                    | <.0001    | <.0001    | 0.0118           | 0.7572           |
| CAT 1 24h          | 0.0003      | <.0001      | <.0001   | 0.0002   | 0.0347      | 0.0547      | <.0001             | <.0001             |           | 0.3339    | 0.0151           | <.0001           |
| CAT 1 48h          | 0.0077      | 0.0006      | 0.0002   | 0.0037   | 0.2359      | 0.3353      | <.0001             | <.0001             | 0.3339    |           | 0.1218           | 0.0001           |
| CAT 1 + NOSC 24h   | 0.3233      | 0.1134      | 0.0351   | 0.216    | 0.684       | 0.4966      | 0.0016             | 0.0118             | 0.0151    | 0.1218    |                  | 0.0262           |
| CAT 1 + NOSC 48h   | 0.1614      | 0.318       | 0.9139   | 0.266    | 0.0071      | 0.0025      | 0.3512             | 0.7572             | <.0001    | 0.0001    | 0.0262           |                  |

COL1A2—collagen type 1 α2; CAT 0.1—cathepsin G 0.1 µg/mL; CAT 1—cathepsin G 1 µg/mL; NOSC—noscapine 45 µg/mL.

**Table S10.** Levels of significance (P values) between cathepsin G (CAT) or noscapine (NOSC) treatments of equine endometrial explants treated for 24h or 48h in the analyses of COL1 protein relative abundance. The results were considered significant at  $P < 0.05$ .

|                    | Control 24h | Control 48h | NOSC 24h | NOSC 48h | CAT 0.1 24h | CAT 0.1 48h | CAT 0.1 + NOSC 24h | CAT 0.1 + NOSC 48h | CAT 1 24h | CAT 1 48h | CAT 1 + NOSC 24h | CAT 1 + NOSC 48h |
|--------------------|-------------|-------------|----------|----------|-------------|-------------|--------------------|--------------------|-----------|-----------|------------------|------------------|
| Control 24h        |             | 0.197       | 0.2731   | 0.5307   | 0.0603      | 0.3084      | 0.1346             | 0.9178             | 0.6388    | 0.0013    | 0.5041           | 0.0064           |
| Control 48h        | 0.197       |             | 0.0162   | 0.0603   | 0.0016      | 0.0121      | 0.0052             | 0.2971             | 0.0766    | <0.001    | 0.0542           | <0.001           |
| NOSC 24h           | 0.2731      | 0.0162      |          | 0.6667   | 0.4259      | 0.8534      | 0.6699             | 0.2751             | 0.5335    | 0.0389    | 0.6974           | 0.0922           |
| NOSC 48h           | 0.5307      | 0.0603      | 0.6667   |          | 0.2308      | 0.7694      | 0.401              | 0.5032             | 0.8627    | 0.0141    | 0.9662           | 0.0399           |
| CAT 0.1 24h        | 0.0603      | 0.0016      | 0.4259   | 0.2308   |             | 0.2932      | 0.7101             | 0.0732             | 0.1559    | 0.2388    | 0.2472           | 0.3751           |
| CAT 0.1 48h        | 0.3084      | 0.0121      | 0.8534   | 0.7694   | 0.2932      |             | 0.5174             | 0.3084             | 0.6155    | 0.0132    | 0.8058           | 0.045            |
| CAT 0.1 + NOSC 24h | 0.1346      | 0.0052      | 0.6699   | 0.401    | 0.7101      | 0.5174      |                    | 0.1404             | 0.2983    | 0.1133    | 0.4251           | 0.2103           |
| CAT 0.1 + NOSC 48h | 0.9178      | 0.2971      | 0.2751   | 0.5032   | 0.0732      | 0.3084      | 0.1404             |                    | 0.5972    | 0.0026    | 0.4778           | 0.0091           |
| CAT 1 24h          | 0.6388      | 0.0766      | 0.5335   | 0.8627   | 0.1559      | 0.6155      | 0.2983             | 0.5972             |           | 0.0062    | 0.8277           | 0.0223           |
| CAT 1 48h          | 0.0013      | <0.001      | 0.0389   | 0.0141   | 0.2388      | 0.0132      | 0.1133             | 0.0026             | 0.0062    |           | 0.0161           | 0.8356           |
| CAT 1 + NOSC 24h   | 0.5041      | 0.0542      | 0.6974   | 0.9662   | 0.2472      | 0.8058      | 0.4251             | 0.4778             | 0.8277    | 0.0161    |                  | 0.0439           |
| CAT 1 + NOSC 48h   | 0.0064      | <0.001      | 0.0922   | 0.0399   | 0.3751      | 0.045       | 0.2103             | 0.0091             | 0.0223    | 0.8356    | 0.0439           |                  |

COL1—collagen type 1; CAT 0.1—cathepsin G 0.1 µg/mL; CAT 1—cathepsin G 1 µg/mL; NOSC—noscapine 45 µg/mL.

**Table S11.** Means and SEM for the performed treatments: (i) cathepsin G (CAT; 0.1 and 1 µg/mL); noscapine (NOSC; 45 µg/mL) or (ii) CAT (0.1 and 1 µg/mL) + NOSC (45 µg/mL) for COL1A2 transcription and COL1 protein relative abundance in equine endometrial explants from follicular phase (FP) or mid-luteal phase (MLP), independently of time of treatment.

|                                        |                | COL1A2 |      | COL1  |      |
|----------------------------------------|----------------|--------|------|-------|------|
| Time of treatment/ estrous cycle phase | Treatment      | Mean   | SEM  | Mean  | SEM  |
| FP                                     | CONTROL        | 92.8   | 14.5 | 99.5  | 6.5  |
|                                        | NOSC           | 74.8   | 17.0 | 119.5 | 9.1  |
|                                        | CAT 0.1        | 162.3  | 23.8 | 124.8 | 7.7  |
|                                        | CAT 0.1 + NOSC | 43.9   | 13.5 | 105.7 | 8.4  |
|                                        | CAT 1          | 153.6  | 21.6 | 113.8 | 7.4  |
|                                        | CAT 1 + NOSC   | 123.7  | 23.7 | 103.0 | 8.8  |
| MLP                                    | CONTROL        | 91.2   | 19.5 | 101.9 | 7.9  |
|                                        | NOSC           | 79.9   | 21.0 | 116.2 | 9.4  |
|                                        | CAT 0.1        | 137.3  | 25.3 | 125.0 | 9.6  |
|                                        | CAT 0.1 + NOSC | 51.5   | 17.1 | 126.7 | 11.1 |
|                                        | CAT 1          | 273.5  | 39.3 | 146.5 | 10.5 |
|                                        | CAT 1 + NOSC   | 66.6   | 19.4 | 159.4 | 11.6 |

COL1A2—collagen type 1  $\alpha$ 2; COL1—collagen type 1; CAT 0.1—cathepsin G 0.1 µg/mL; CAT 1—cathepsin G 1 µg/mL; NOSC—noscapine 45 µg/mL; FP - follicular phase; MLP - mid-luteal phase.



**Table S12.** Levels of significance (P values) between cathepsin G (CAT) or noscapine (NOSC) treatments of equine endometrial explants from follicular phase (FP) or mid-luteal phase (MLP) in the analyses of relative transcript COL1A2 gene. The results were considered significant at  $P < 0.05$ .

|                    | Control FP | Control MLP | NOSC FP | NOSC MLP | CAT 0.1 FP | CAT 0.1 MLP | CAT 0.1 + NOSC FP | CAT 0.1 + NOSC MLP | CAT 1 FP | CAT 1 MLP | CAT 1 + NOSC FP | CAT 1 + NOSC MLP |
|--------------------|------------|-------------|---------|----------|------------|-------------|-------------------|--------------------|----------|-----------|-----------------|------------------|
| Control FP         |            | 0.9458      | 0.423   | 0.6139   | 0.0101     | 0.113       | 0.0178            | 0.0798             | 0.0169   | <.0001    | 0.2509          | 0.2919           |
| Control MLP        | 0.9458     |             | 0.5206  | 0.6881   | 0.0214     | 0.1422      | 0.0428            | 0.1282             | 0.0343   | <.0001    | 0.283           | 0.3722           |
| NOSC FP            | 0.423      | 0.5206      |         | 0.8511   | 0.0029     | 0.0364      | 0.1503            | 0.3355             | 0.0047   | <.0001    | 0.0872          | 0.7489           |
| NOSC MLP           | 0.6139     | 0.6881      | 0.8511  |          | 0.0119     | 0.0822      | 0.1348            | 0.2887             | 0.0184   | <.0001    | 0.166           | 0.6397           |
| CAT 0.1 FP         | 0.0101     | 0.0214      | 0.0029  | 0.0119   |            | 0.4716      | <.0001            | 0.0003             | 0.7845   | 0.0125    | 0.2508          | 0.0028           |
| CAT 0.1 MLP        | 0.113      | 0.1422      | 0.0364  | 0.0822   | 0.4716     |             | 0.0007            | 0.0051             | 0.6234   | 0.003     | 0.6928          | 0.0273           |
| CAT 0.1 + NOSC FP  | 0.0178     | 0.0428      | 0.1503  | 0.1348   | <.0001     | 0.0007      |                   | 0.7234             | <.0001   | <.0001    | 0.0025          | 0.3233           |
| CAT 0.1 + NOSC MLP | 0.0798     | 0.1282      | 0.3355  | 0.2887   | 0.0003     | 0.0051      | 0.7234            |                    | 0.0005   | <.0001    | 0.0138          | 0.5544           |
| CAT 1 FP           | 0.0169     | 0.0343      | 0.0047  | 0.0184   | 0.7845     | 0.6234      | <.0001            | 0.0005             |          | 0.0053    | 0.3519          | 0.0044           |
| CAT 1 MLP          | <.0001     | <.0001      | <.0001  | <.0001   | 0.0125     | 0.003       | <.0001            | <.0001             | 0.0053   |           | 0.0008          | <.0001           |
| CAT 1 + NOSC FP    | 0.2509     | 0.283       | 0.0872  | 0.166    | 0.2508     | 0.6928      | 0.0025            | 0.0138             | 0.3519   | 0.0008    |                 | 0.0632           |
| CAT 1 + NOSC MLP   | 0.2919     | 0.3722      | 0.7489  | 0.6397   | 0.0028     | 0.0273      | 0.3233            | 0.5544             | 0.0044   | <.0001    | 0.0632          |                  |

COL1A2—collagen type 1  $\alpha 2$ ; CAT 0.1—cathepsin G 0.1  $\mu\text{g/mL}$ ; CAT 1—cathepsin G 1  $\mu\text{g/mL}$ ; NOSC—noscapine 45  $\mu\text{g/mL}$ ; FP—follicular phase; MLP—mid-luteal phase.

**Table S13.** Levels of significance (P values) between cathepsin G (CAT) or noscapine (NOSC) treatments of equine endometrial explants treated from follicular phase (FP) or mid-luteal phase (MLP) in the analyses of COL1 protein relative abundance. The results were considered significant at  $P < 0.05$ .

|                    | Control FP | Control MLP | NOSC FP | NOSC MLP | CAT 0.1 FP | CAT 0.1 MLP | CAT 0.1 + NOSC FP | CAT 0.1 + NOSC MLP | CAT 1 FP | CAT 1 MLP | CAT 1 + NOSC FP | CAT 1 + NOSC MLP |
|--------------------|------------|-------------|---------|----------|------------|-------------|-------------------|--------------------|----------|-----------|-----------------|------------------|
| Control FP         |            | 0.815       | 0.0709  | 0.1365   | 0.0124     | 0.0259      | 0.5561            | 0.0306             | 0.1427   | 0.0001    | 0.7475          | <.0001           |
| Control MLP        | 0.815      |             | 0.1416  | 0.2377   | 0.0405     | 0.0607      | 0.74              | 0.0649             | 0.2702   | 0.0008    | 0.925           | <.0001           |
| NOSC FP            | 0.0709     | 0.1416      |         | 0.8036   | 0.6542     | 0.6737      | 0.2652            | 0.6102             | 0.6288   | 0.0517    | 0.1926          | 0.0066           |
| NOSC MLP           | 0.1365     | 0.2377      | 0.8036  |          | 0.4799     | 0.5108      | 0.4002            | 0.4662             | 0.84     | 0.0319    | 0.3009          | 0.0038           |
| CAT 0.1 FP         | 0.0124     | 0.0405      | 0.6542  | 0.4799   |            | 0.9847      | 0.0971            | 0.885              | 0.3038   | 0.0927    | 0.066           | 0.0117           |
| CAT 0.1 MLP        | 0.0259     | 0.0607      | 0.6737  | 0.5108   | 0.9847     |             | 0.1292            | 0.9075             | 0.3517   | 0.1297    | 0.0918          | 0.0219           |
| CAT 0.1 + NOSC FP  | 0.5561     | 0.74        | 0.2652  | 0.4002   | 0.0971     | 0.1292      |                   | 0.1275             | 0.4668   | 0.0026    | 0.8233          | 0.0002           |
| CAT 0.1 + NOSC MLP | 0.0306     | 0.0649      | 0.6102  | 0.4662   | 0.885      | 0.9075      | 0.1275            |                    | 0.3272   | 0.196     | 0.0919          | 0.0421           |
| CAT 1 FP           | 0.1427     | 0.2702      | 0.6288  | 0.84     | 0.3038     | 0.3517      | 0.4668            | 0.3272             |          | 0.0104    | 0.3462          | 0.0008           |
| CAT 1 MLP          | 0.0001     | 0.0008      | 0.0517  | 0.0319   | 0.0927     | 0.1297      | 0.0026            | 0.196              | 0.0104   |           | 0.0017          | 0.4022           |
| CAT 1 + NOSC FP    | 0.7475     | 0.925       | 0.1926  | 0.3009   | 0.066      | 0.0918      | 0.8233            | 0.0919             | 0.3462   | 0.0017    |                 | 0.0001           |
| CAT 1 + NOSC MLP   | <.0001     | <.0001      | 0.0066  | 0.0038   | 0.0117     | 0.0219      | 0.0002            | 0.0421             | 0.0008   | 0.4022    | 0.0001          |                  |

COL1—collagen type 1; CAT 0.1—cathepsin G 0.1  $\mu\text{g/mL}$ ; CAT 1—cathepsin G 1  $\mu\text{g/mL}$ ; NOSC—noscapine 45  $\mu\text{g/mL}$ ; FP—follicular phase; MLP—mid-luteal phase.
